# Supplementary material
Source: bioRxiv or medRxiv preprint supplement (https://www.biorxiv.org/highwire/filestream/89579/field_highwire_adjunct_files/0/290296-1.pdf)

Supplementary Figure 1

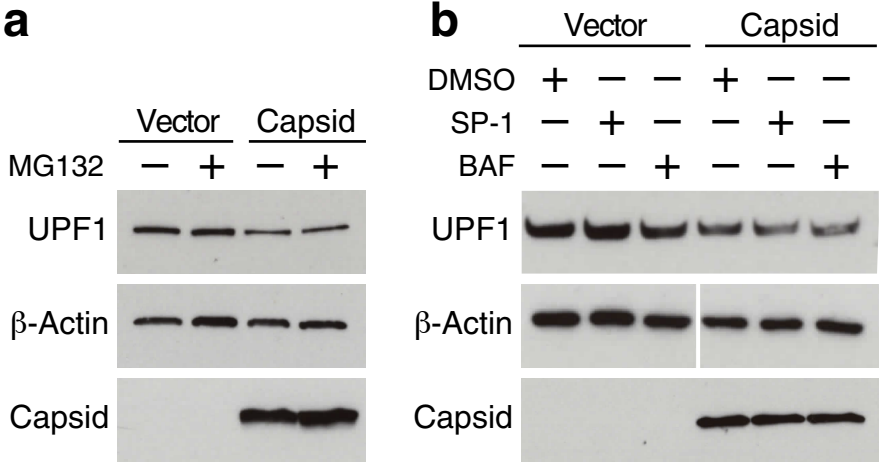

Supplement: Supplementary file [file 290296-1.pdf]
